# Supplementary material
Source: Springer Nature journal article supplement (https://www.springermedizin.de/resource/supplementary/12906_2011_465_MOESM5_ESM.pdf/9519546)

(a) ■ GLGPG -○- RH

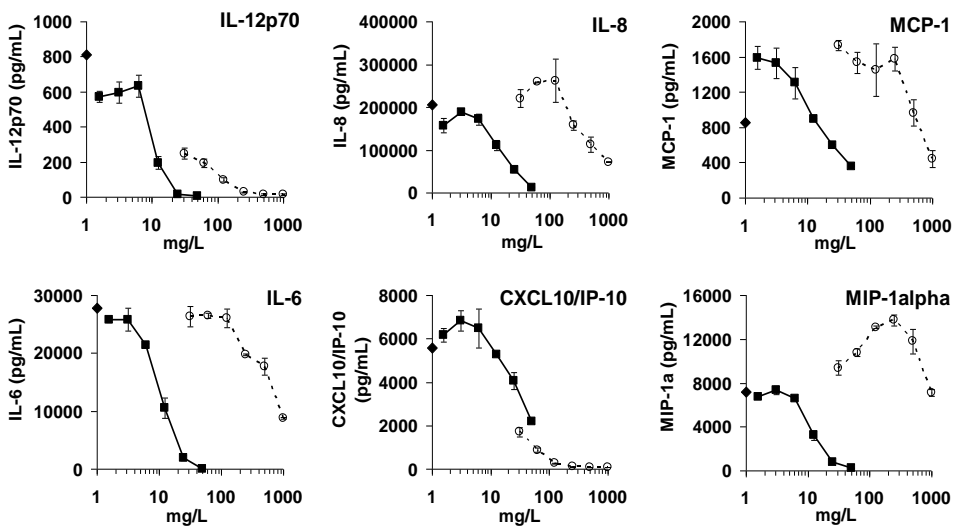

(b)

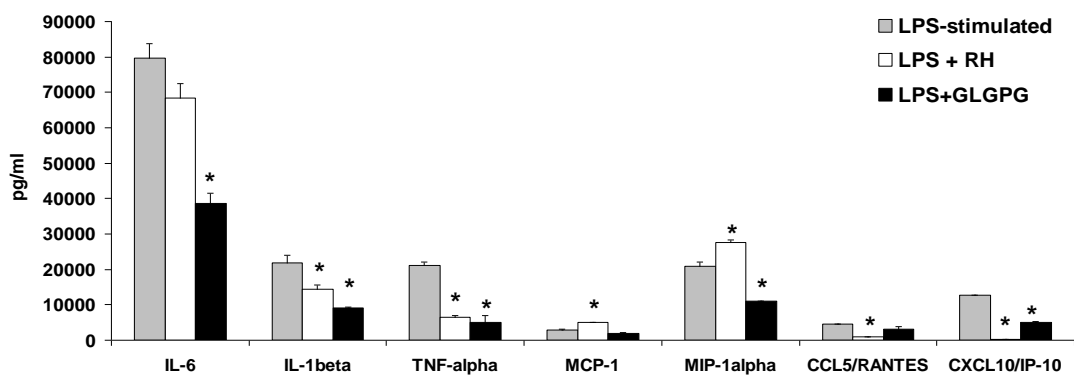

(c)

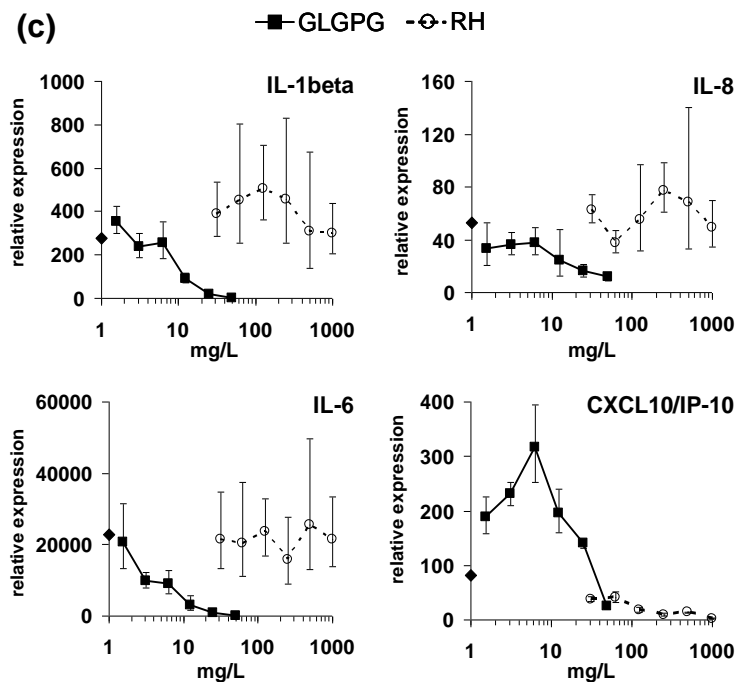

Supplement: MOESM5 [file 9519546]
